# Supplementary material
Source: PubMed Central journal article supplement (PMC522033)

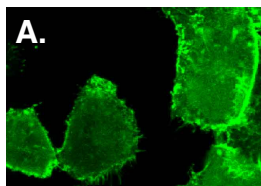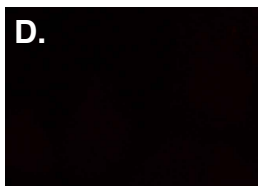

**PHGFP**

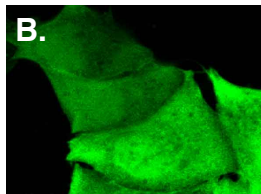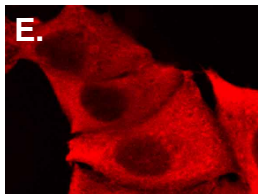

**PHGFP+  
5ptaseIV**

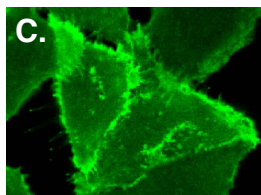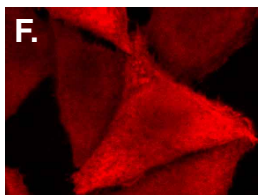

**PHGFP+  
Δ1**

**GFP**

**anti-Myc**

Supplement: pnas_101_41_14889__2.pdf [file pnas_101_41_14889__2.pdf]

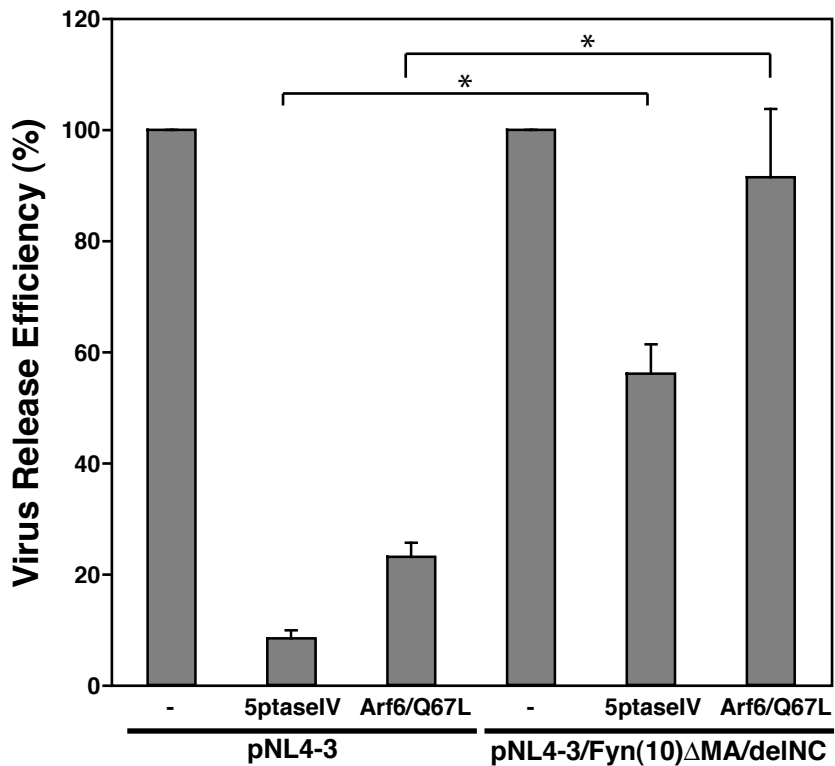

Supplement: pnas_101_41_14889__3.pdf [file pnas_101_41_14889__3.pdf]

**A. 5ptaseIV**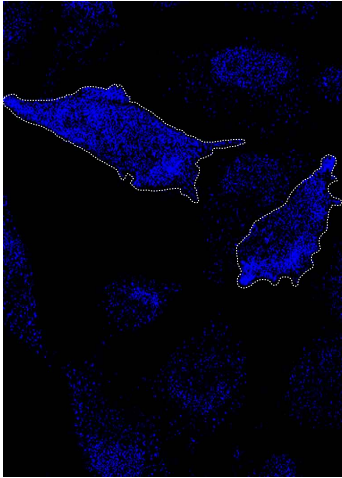**B. Gag**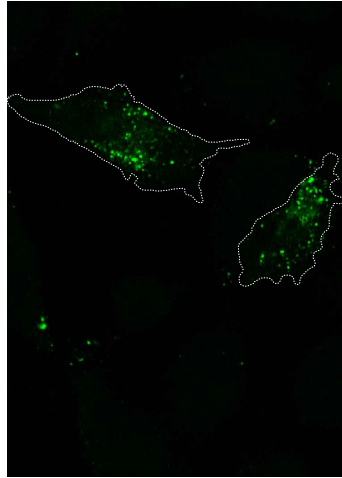**C. Tf**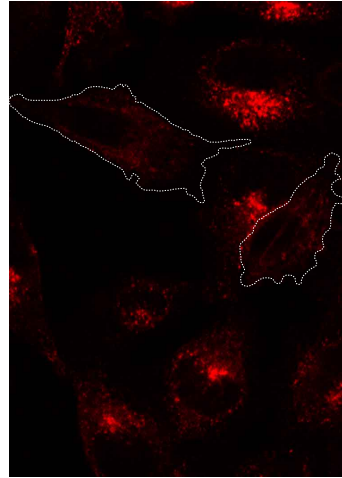

pNL4-3 +  
5ptaseIV

**D. AP180 C-t**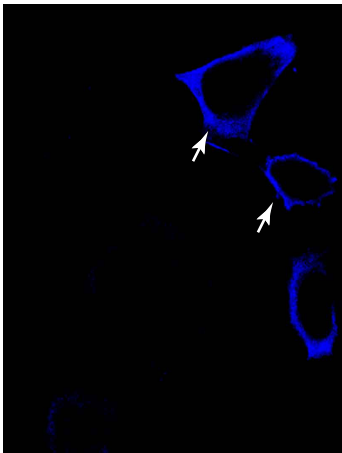**E. Gag**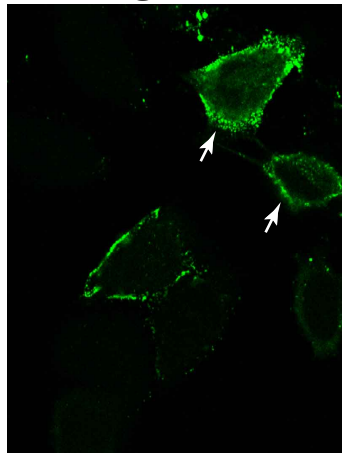**F. Tf**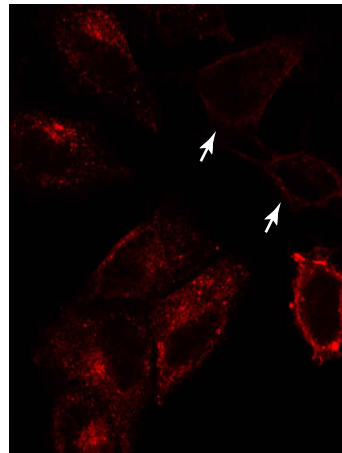

pNL4-3 +  
AP180 C-t

**G.**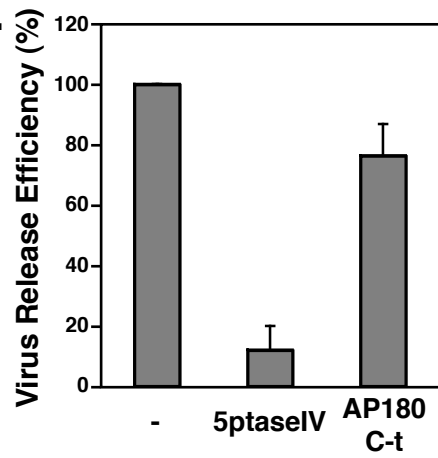**H.**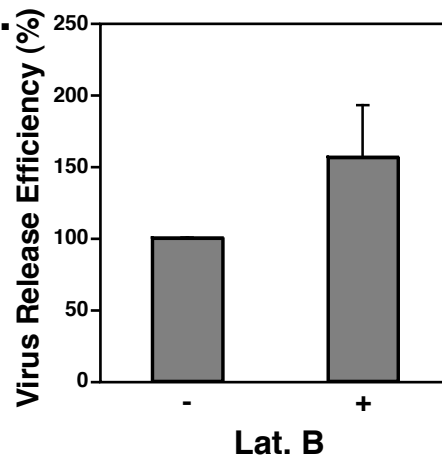

Supplement: pnas_101_41_14889__4.pdf [file pnas_101_41_14889__4.pdf]

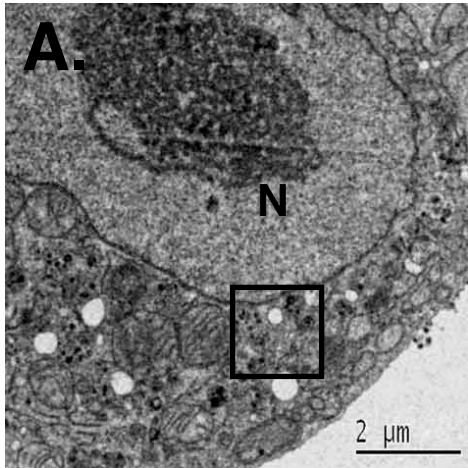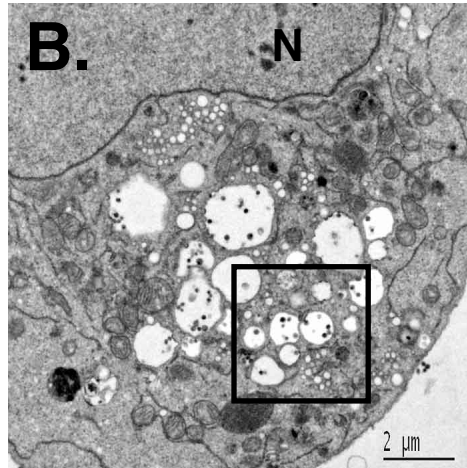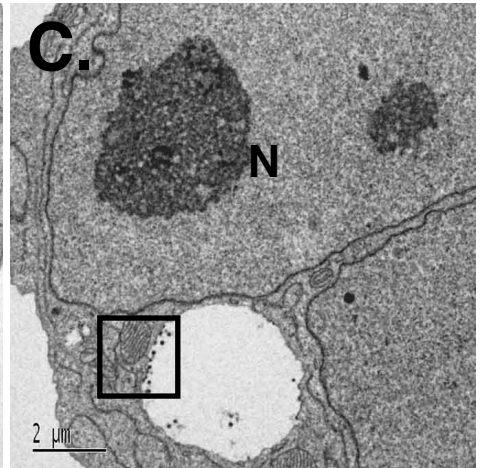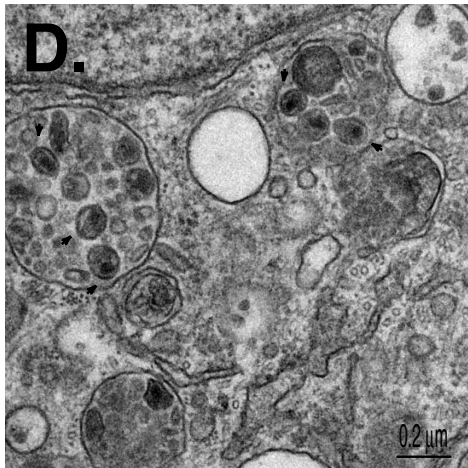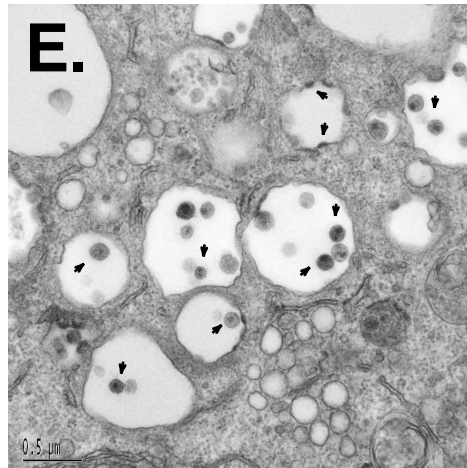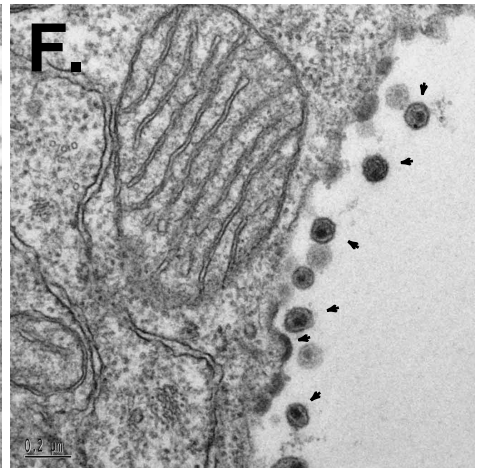

**pNL4-3 +  
5ptaseIV**

**pNL4-3 + Arf6/Q67L**

Supplement: pnas_101_41_14889__5.pdf [file pnas_101_41_14889__5.pdf]
